# Supplementary material for: Photophysical tuning of the aggregation-induced emission of a series of para-substituted aryl bis(imino)acenaphthene zinc complexes
Source: Royal Society of Chemistry journal article supplement (doi:10.1039/c5dt01529d), 2015-01-01
Supplement: c5dt01529d1.pdf [file c5dt01529d1.pdf]

## Supplementary Information

### Photophysical Tuning of the Aggregation-Induced Emission of a Series of *para*-Substituted Bis(imino)acenaphthene Zinc Complexes

By

Daniel A. Evans,<sup>†</sup> Lucia Myongwon Lee,<sup>‡</sup> Ignacio Vargas-Baca,<sup>‡</sup> Alan H. Cowley<sup>\*†</sup>

<sup>†</sup> Department of Chemistry, The University of Texas at Austin, 1 University Station A5300, Austin, Texas 78712-0165

<sup>‡</sup> Department of Chemistry and Chemical Biology, McMaster University, Hamilton, Ontario, Canada L8S 4M1

#### Table of Contents:

- 1) Fluorescence Spectroscopy
- 2) Single Crystal X-ray Crystallographic Data
- 3) TD-DFT Calculated Excitations
- 4) References

## 1) Fluorescence Spectroscopy

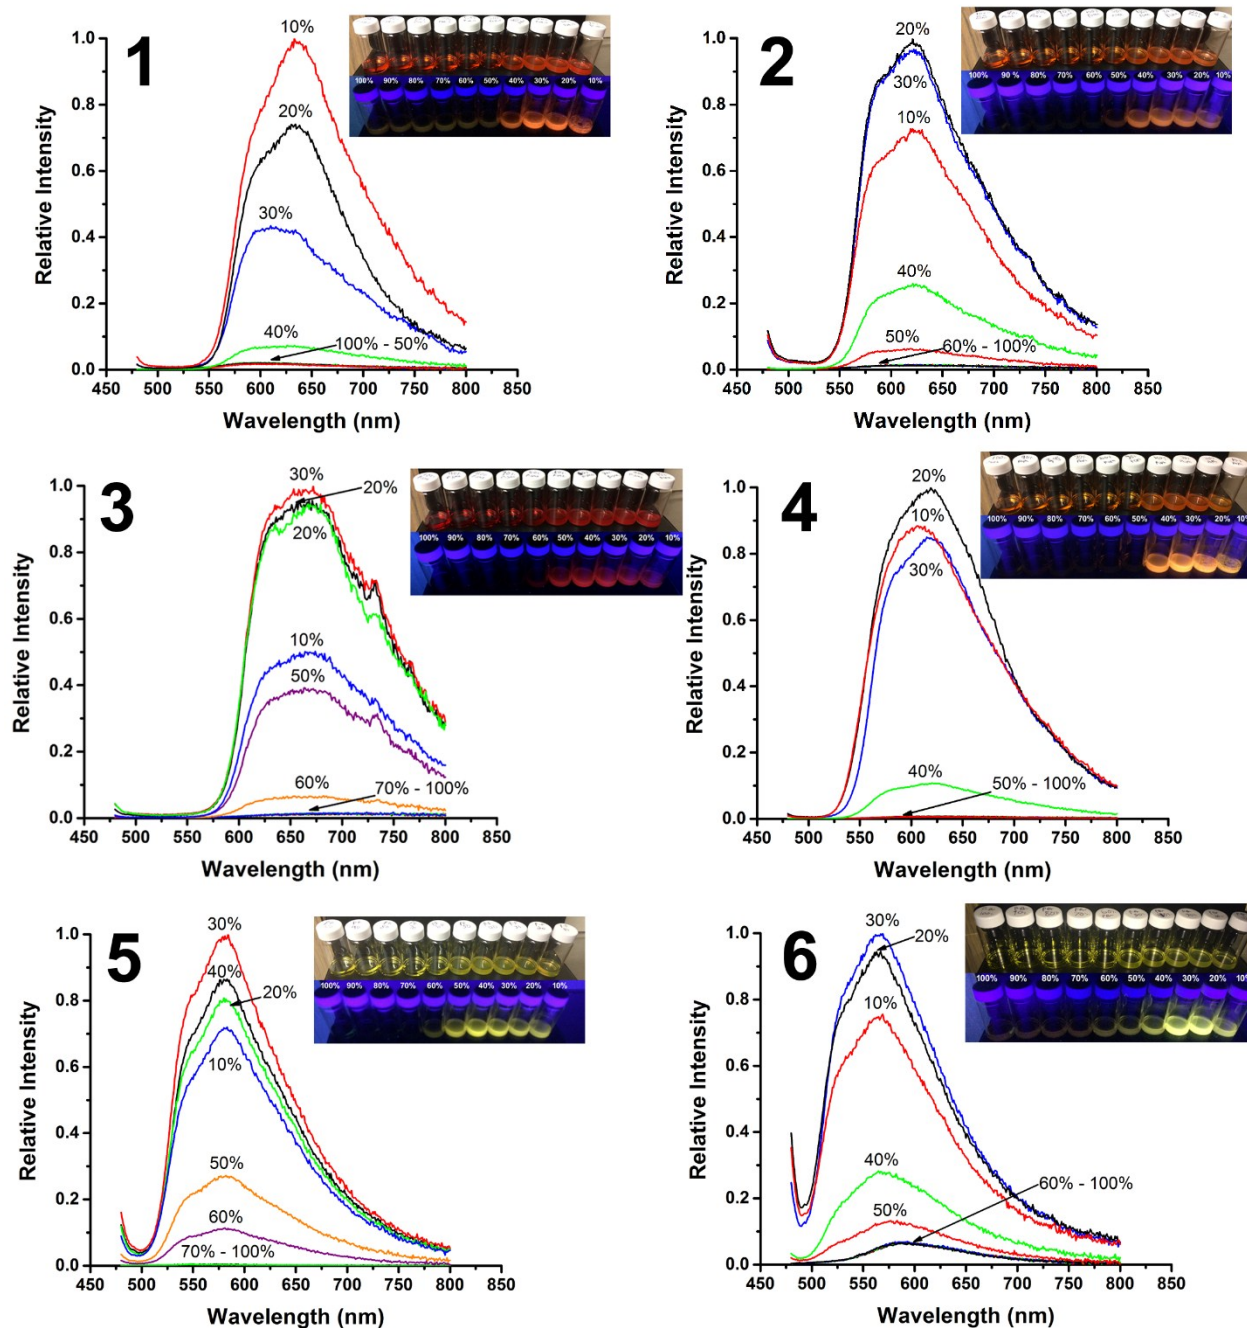

**Figure S1.** AIE experiment for DCM solutions ( $\sim 10^{-4}$ - $10^{-3}$  M) of complexes **1-6** with images of each DCM/hexanes volumetric fraction in ambient light and under UV irradiation (the percentage values above are relative to the DCM content).

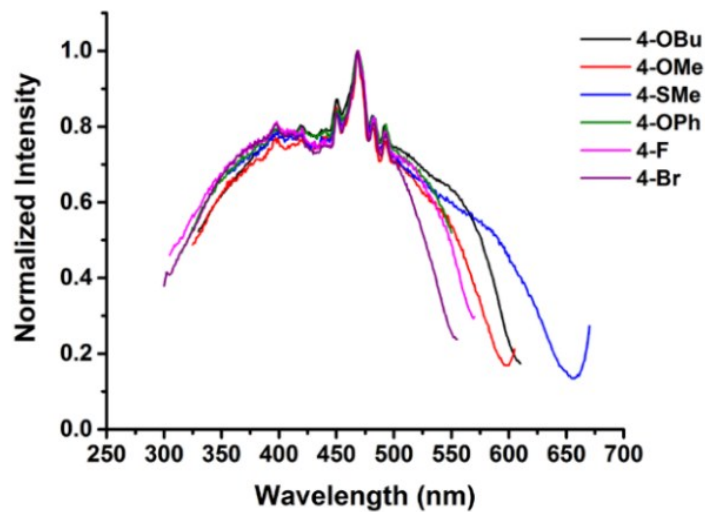

**Figure S2.** Excitation spectra for complexes 1-6.

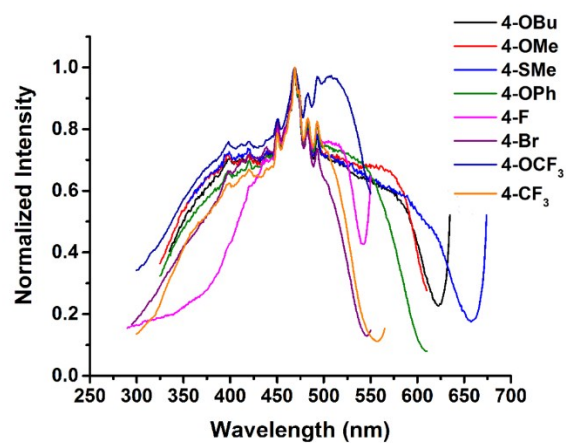

**Figure S3.** Excitation spectra for solvatomorphs 1-DCM-8-DCM.

## 2) X-ray Crystallographic Data

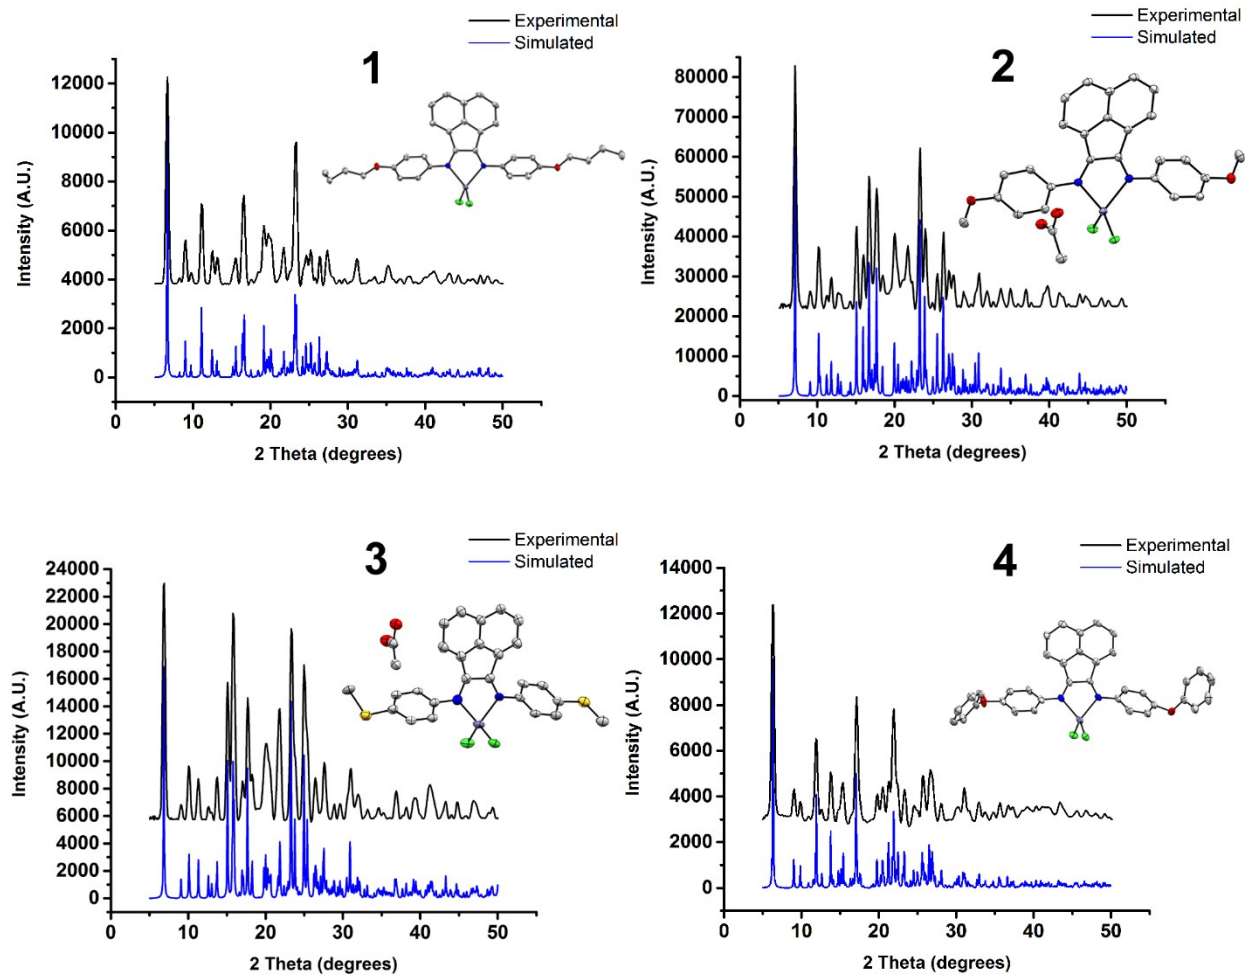

**Figure S4.** Experimental (black) and simulated (blue) powder X-ray crystallography patterns for complexes 1-4. All experimental spectra were background corrected using the Eva program.<sup>1</sup>

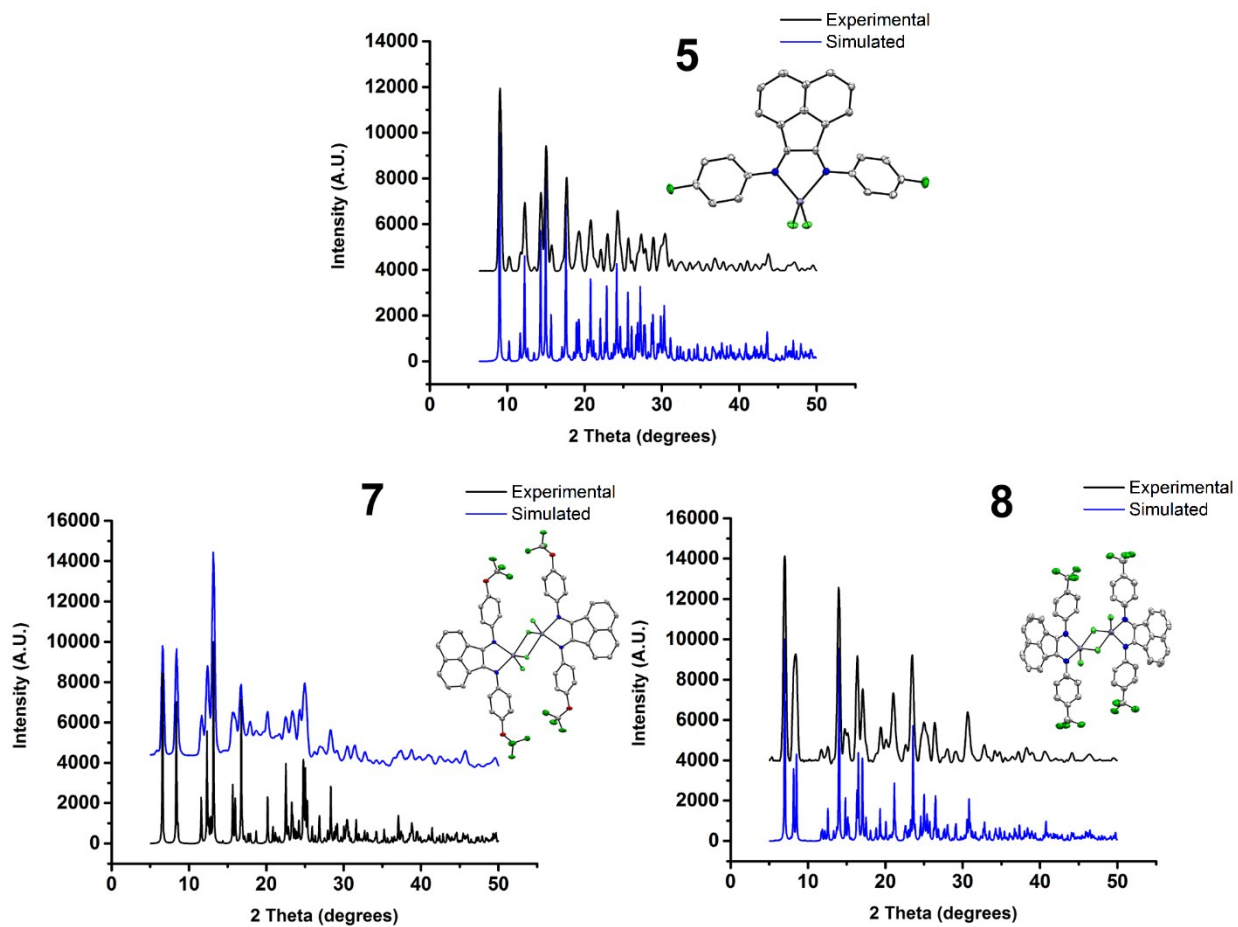

**Figure S5.** Experimental (black) and simulated (blue) powder X-ray crystallography patterns for complexes 5, 7, and 8. All experimental spectra were background corrected using the Eva program.<sup>1</sup>

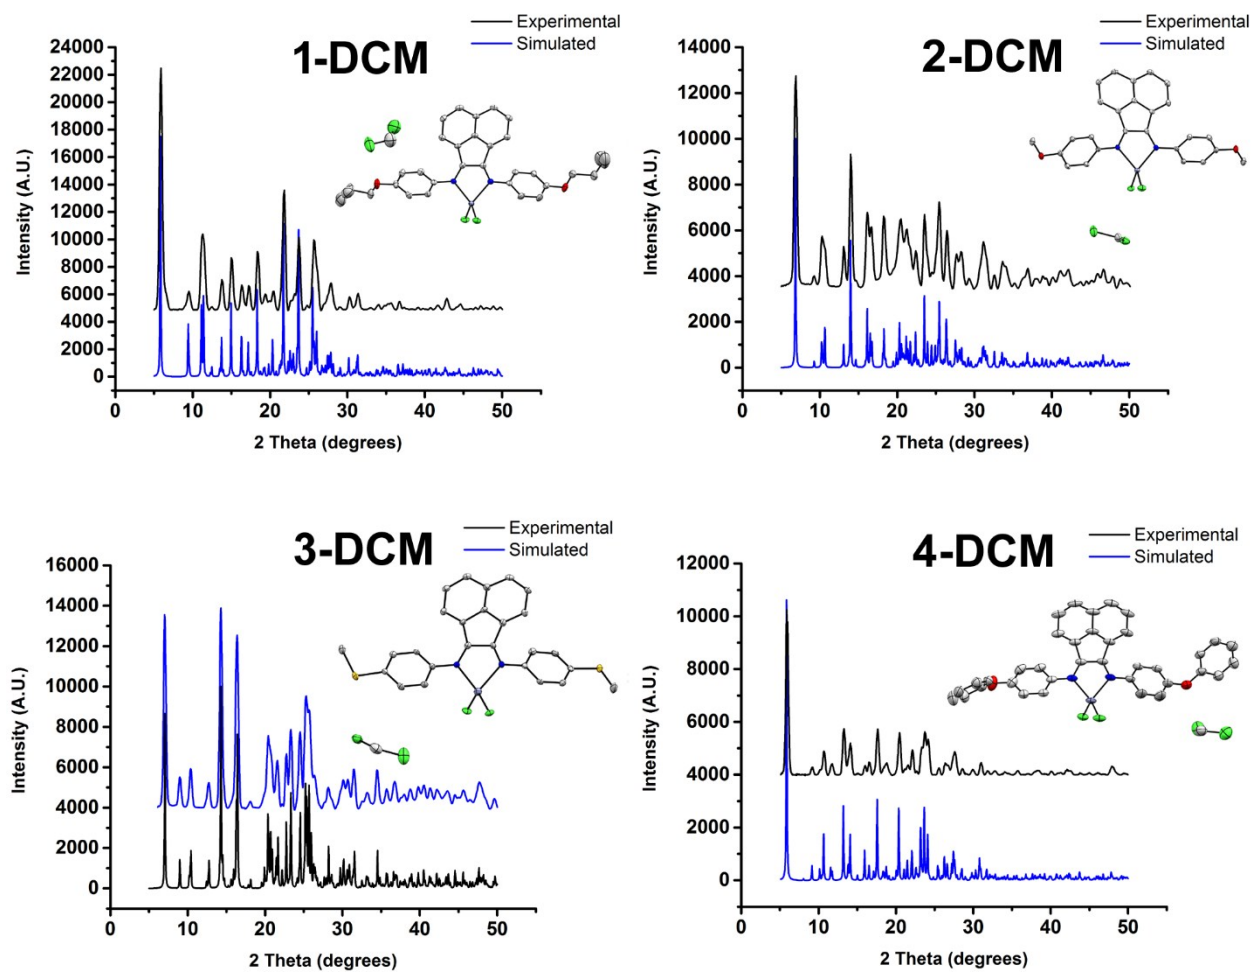

**Figure S6.** Experimental (black) and simulated (blue) powder X-ray crystallography patterns for complexes 1-DCM-4-DCM. All experimental spectra were background corrected using the Eva program.<sup>1</sup>

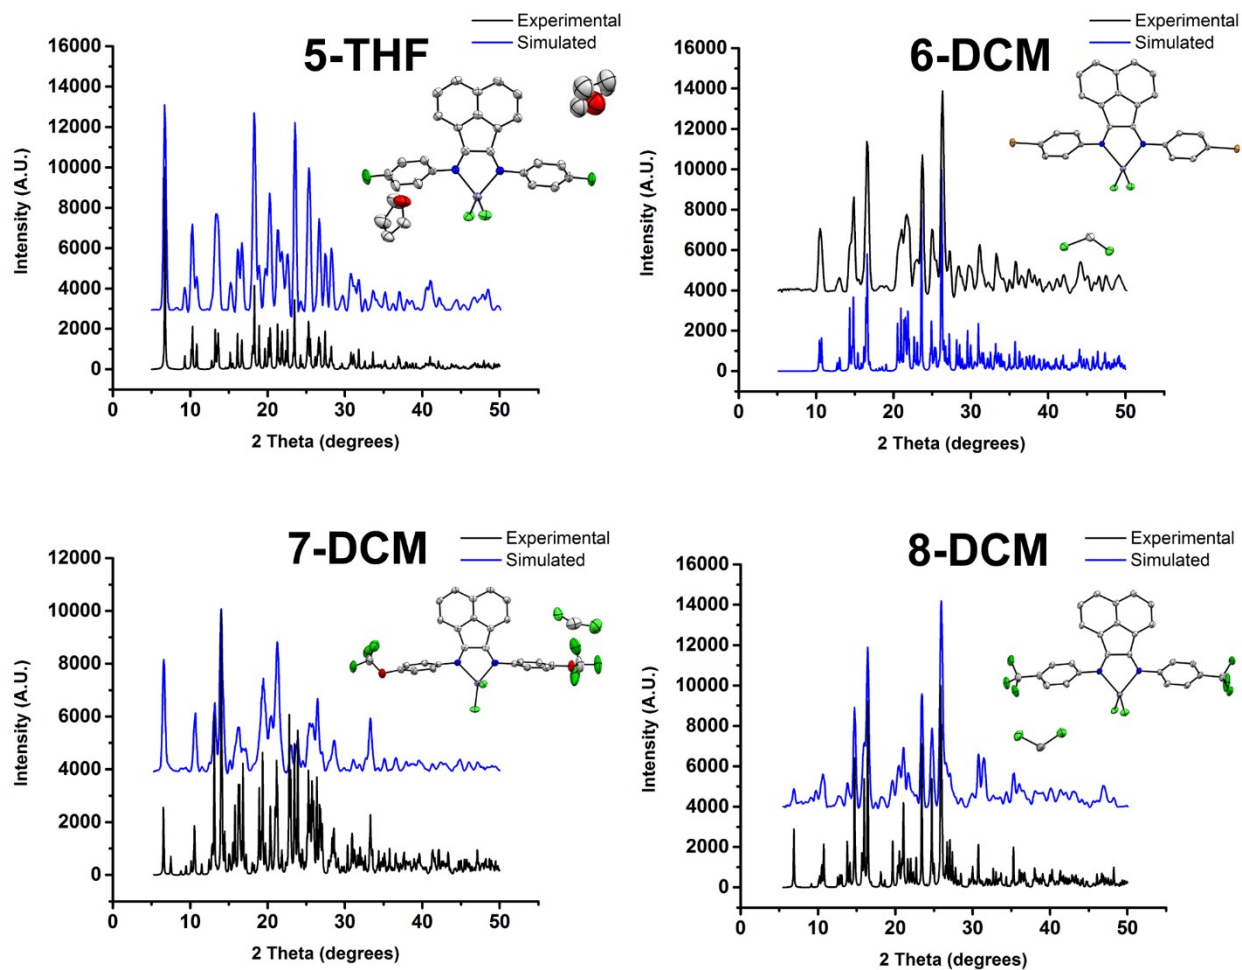

**Figure S7.** Experimental (black) and simulated (blue) powder X-ray crystallography patterns for complexes **5-THF-8-DCM**. All experimental spectra were background corrected using the Eva program.<sup>1</sup>

### 3) Single Crystal X-ray Crystallographic Data

Table 1. Crystal data and structure refinement for **1**.

|                                   |                                             |                               |
|-----------------------------------|---------------------------------------------|-------------------------------|
| Empirical formula                 | $C_{32}H_{32}Cl_2N_2O_2Zn$                  |                               |
| Formula weight                    | 612.87                                      |                               |
| Temperature                       | 100(2) K                                    |                               |
| Wavelength                        | 1.54184 Å                                   |                               |
| Crystal system                    | Monoclinic                                  |                               |
| Space group                       | I2/a                                        |                               |
| Unit cell dimensions              | $a = 18.3252(3)$ Å                          | $\alpha = 90^\circ$ .         |
|                                   | $b = 11.6963(2)$ Å                          | $\beta = 97.0670(10)^\circ$ . |
|                                   | $c = 26.7400(4)$ Å                          | $\gamma = 90^\circ$ .         |
| Volume                            | 5687.83(16) Å <sup>3</sup>                  |                               |
| Z                                 | 8                                           |                               |
| Density (calculated)              | 1.431 Mg/m <sup>3</sup>                     |                               |
| Absorption coefficient            | 3.182 mm <sup>-1</sup>                      |                               |
| F(000)                            | 2544                                        |                               |
| Crystal size                      | 0.03 x 0.05 x 0.38 mm <sup>3</sup>          |                               |
| Theta range for data collection   | 3.33 to 76.26°.                             |                               |
| Index ranges                      | -22 ≤ h ≤ 22, -14 ≤ k ≤ 13, -33 ≤ l ≤ 33    |                               |
| Reflections collected             | 27764                                       |                               |
| Independent reflections           | 5871 [R(int) = 0.0342]                      |                               |
| Completeness to theta = 76.26°    | 98.3 %                                      |                               |
| Absorption correction             | Semi-empirical from equivalents             |                               |
| Max. and min. transmission        | 1.00000 and 0.49341                         |                               |
| Refinement method                 | Full-matrix least-squares on F <sup>2</sup> |                               |
| Data / restraints / parameters    | 5871 / 0 / 354                              |                               |
| Goodness-of-fit on F <sup>2</sup> | 1.055                                       |                               |
| Final R indices [I > 2σ(I)]       | R1 = 0.0335, wR2 = 0.0889                   |                               |
| R indices (all data)              | R1 = 0.0365, wR2 = 0.0918                   |                               |
| Largest diff. peak and hole       | 0.466 and -0.521                            |                               |



Table 2. Crystal data and structure refinement for **2**.

|                                   |                                                                                  |                 |
|-----------------------------------|----------------------------------------------------------------------------------|-----------------|
| Empirical formula                 | C <sub>28</sub> H <sub>24</sub> Cl <sub>2</sub> N <sub>2</sub> O <sub>4</sub> Zn |                 |
| Formula weight                    | 588.76                                                                           |                 |
| Temperature                       | 153(2) K                                                                         |                 |
| Wavelength                        | 1.54184 Å                                                                        |                 |
| Crystal system                    | Monoclinic                                                                       |                 |
| Space group                       | P2 <sub>1</sub> /c                                                               |                 |
| Unit cell dimensions              | a = 12.4510(3) Å                                                                 | α = 90°.        |
|                                   | b = 11.7454(3) Å                                                                 | β = 95.969(2)°. |
|                                   | c = 17.4508(4) Å                                                                 | γ = 90°.        |
| Volume                            | 2538.20(11) Å <sup>3</sup>                                                       |                 |
| Z                                 | 4                                                                                |                 |
| Density (calculated)              | 1.541 Mg/m <sup>3</sup>                                                          |                 |
| Absorption coefficient            | 3.603 mm <sup>-1</sup>                                                           |                 |
| F(000)                            | 1208                                                                             |                 |
| Crystal size                      | 0.14 x 0.09 x 0.07 mm <sup>3</sup>                                               |                 |
| Theta range for data collection   | 3.57 to 74.33°.                                                                  |                 |
| Index ranges                      | -12 ≤ h ≤ 15, -12 ≤ k ≤ 14, -19 ≤ l ≤ 21                                         |                 |
| Reflections collected             | 9920                                                                             |                 |
| Independent reflections           | 5030 [R(int) = 0.0284]                                                           |                 |
| Completeness to theta = 74.33°    | 97.0 %                                                                           |                 |
| Absorption correction             | Semi-empirical from equivalents                                                  |                 |
| Max. and min. transmission        | 1.00000 and 0.74906                                                              |                 |
| Refinement method                 | Full-matrix least-squares on F <sup>2</sup>                                      |                 |
| Data / restraints / parameters    | 5030 / 0 / 341                                                                   |                 |
| Goodness-of-fit on F <sup>2</sup> | 1.037                                                                            |                 |
| Final R indices [I > 2σ(I)]       | R1 = 0.0320, wR2 = 0.0837                                                        |                 |
| R indices (all data)              | R1 = 0.0365, wR2 = 0.0872                                                        |                 |
| Largest diff. peak and hole       | 0.476 and -0.425 e.Å <sup>-3</sup>                                               |                 |

Table 3. Crystal data and structure refinement for **3**.

|                                   |                                                                    |                              |
|-----------------------------------|--------------------------------------------------------------------|------------------------------|
| Empirical formula                 | $C_{28}H_{24}Cl_2N_2O_2S_2Zn$                                      |                              |
| Formula weight                    | 620.88                                                             |                              |
| Temperature                       | 100(2) K                                                           |                              |
| Wavelength                        | 1.54184 Å                                                          |                              |
| Crystal system                    | Monoclinic                                                         |                              |
| Space group                       | $P2_1/c$                                                           |                              |
| Unit cell dimensions              | $a = 13.036(3)$ Å                                                  | $\alpha = 90^\circ$ .        |
|                                   | $b = 11.7210(15)$ Å                                                | $\beta = 98.657(16)^\circ$ . |
|                                   | $c = 17.716(2)$ Å                                                  | $\gamma = 90^\circ$ .        |
| Volume                            | $2676.1(8)$ Å <sup>3</sup>                                         |                              |
| Z                                 | 4                                                                  |                              |
| Density (calculated)              | 1.541 Mg/m <sup>3</sup>                                            |                              |
| Absorption coefficient            | $4.813$ mm <sup>-1</sup>                                           |                              |
| F(000)                            | 1272                                                               |                              |
| Crystal size                      | 0.070 x 0.030 x 0.010 mm <sup>3</sup>                              |                              |
| Theta range for data collection   | 3.429 to 67.484°.                                                  |                              |
| Index ranges                      | $-15 \leq h \leq 15$ , $-10 \leq k \leq 14$ , $-21 \leq l \leq 20$ |                              |
| Reflections collected             | 16148                                                              |                              |
| Independent reflections           | 16148 [R(int) = 0.0000]                                            |                              |
| Completeness to theta = 67.684°   | 99.4 %                                                             |                              |
| Absorption correction             | Semi-empirical from equivalents                                    |                              |
| Max. and min. transmission        | 1.00000 and 0.60099                                                |                              |
| Refinement method                 | Full-matrix least-squares on F <sup>2</sup>                        |                              |
| Data / restraints / parameters    | 16148 / 528 / 338                                                  |                              |
| Goodness-of-fit on F <sup>2</sup> | 1.088                                                              |                              |
| Final R indices [I > 2sigma(I)]   | R1 = 0.1556, wR2 = 0.3454                                          |                              |
| R indices (all data)              | R1 = 0.3689, wR2 = 0.3854                                          |                              |
| Largest diff. peak and hole       | 0.690 and -0.858 e.Å <sup>-3</sup>                                 |                              |

Table 4. Crystal data and structure refinement for **4**.

|                                   |                                                                    |                             |
|-----------------------------------|--------------------------------------------------------------------|-----------------------------|
| Empirical formula                 | $C_{36}H_{24}Cl_2N_2O_2Zn$                                         |                             |
| Formula weight                    | 652.84                                                             |                             |
| Temperature                       | 100(2) K                                                           |                             |
| Wavelength                        | 1.54184 Å                                                          |                             |
| Crystal system                    | Monoclinic                                                         |                             |
| Space group                       | $P2_1/c$                                                           |                             |
| Unit cell dimensions              | $a = 14.0015(9)$ Å                                                 | $\alpha = 90^\circ$ .       |
|                                   | $b = 11.7228(9)$ Å                                                 | $\beta = 91.996(6)^\circ$ . |
|                                   | $c = 17.9471(12)$ Å                                                | $\gamma = 90^\circ$ .       |
| Volume                            | $2944.0(4)$ Å <sup>3</sup>                                         |                             |
| Z                                 | 4                                                                  |                             |
| Density (calculated)              | 1.473 Mg/m <sup>3</sup>                                            |                             |
| Absorption coefficient            | $3.122$ mm <sup>-1</sup>                                           |                             |
| F(000)                            | 1336                                                               |                             |
| Crystal size                      | 0.10 x 0.03 x 0.02 mm <sup>3</sup>                                 |                             |
| Theta range for data collection   | 4.506 to 76.612°.                                                  |                             |
| Index ranges                      | $-17 \leq h \leq 17$ , $-14 \leq k \leq 14$ , $-22 \leq l \leq 21$ |                             |
| Reflections collected             | 33186                                                              |                             |
| Independent reflections           | 6070 [R(int) = 0.1948]                                             |                             |
| Completeness to theta = 67.684°   | 99.9 %                                                             |                             |
| Absorption correction             | Semi-empirical from equivalents                                    |                             |
| Max. and min. transmission        | 1.00000 and 0.89282                                                |                             |
| Refinement method                 | Full-matrix least-squares on F <sup>2</sup>                        |                             |
| Data / restraints / parameters    | 6070 / 0 / 388                                                     |                             |
| Goodness-of-fit on F <sup>2</sup> | 1.409                                                              |                             |
| Final R indices [I > 2sigma(I)]   | R1 = 0.1160, wR2 = 0.3155                                          |                             |
| R indices (all data)              | R1 = 0.2048, wR2 = 0.3473                                          |                             |
| Largest diff. peak and hole       | 0.512 and -0.877 e.Å <sup>-3</sup>                                 |                             |

Table 5. Crystal data and structure refinement for **5**.

|                                   |                                                                                  |                  |
|-----------------------------------|----------------------------------------------------------------------------------|------------------|
| Empirical formula                 | C <sub>24</sub> H <sub>14</sub> Cl <sub>2</sub> F <sub>2</sub> N <sub>2</sub> Zn |                  |
| Formula weight                    | 504.64                                                                           |                  |
| Temperature                       | 100(2) K                                                                         |                  |
| Wavelength                        | 0.71075 Å                                                                        |                  |
| Crystal system                    | Monoclinic                                                                       |                  |
| Space group                       | P2 <sub>1</sub> /c                                                               |                  |
| Unit cell dimensions              | a = 9.984(3) Å                                                                   | α = 90°.         |
|                                   | b = 11.965(4) Å                                                                  | β = 101.504(5)°. |
|                                   | c = 17.609(7) Å                                                                  | γ = 90°.         |
| Volume                            | 2061.3(13) Å <sup>3</sup>                                                        |                  |
| Z                                 | 4                                                                                |                  |
| Density (calculated)              | 1.626 Mg/m <sup>3</sup>                                                          |                  |
| Absorption coefficient            | 1.483 mm <sup>-1</sup>                                                           |                  |
| F(000)                            | 1016                                                                             |                  |
| Crystal size                      | 0.110 x 0.090 x 0.050 mm <sup>3</sup>                                            |                  |
| Theta range for data collection   | 2.071 to 24.999°.                                                                |                  |
| Index ranges                      | -9 ≤ h ≤ 11, -14 ≤ k ≤ 14, -20 ≤ l ≤ 20                                          |                  |
| Reflections collected             | 21742                                                                            |                  |
| Independent reflections           | 3627 [R(int) = 0.0626]                                                           |                  |
| Completeness to theta = 24.999°   | 99.9 %                                                                           |                  |
| Absorption correction             | Semi-empirical from equivalents                                                  |                  |
| Max. and min. transmission        | 1.00000 and 0.7659                                                               |                  |
| Refinement method                 | Full-matrix least-squares on F <sup>2</sup>                                      |                  |
| Data / restraints / parameters    | 3627 / 0 / 280                                                                   |                  |
| Goodness-of-fit on F <sup>2</sup> | 1.245                                                                            |                  |
| Final R indices [I > 2σ(I)]       | R1 = 0.0506, wR2 = 0.0868                                                        |                  |
| R indices (all data)              | R1 = 0.0539, wR2 = 0.0881                                                        |                  |
| Largest diff. peak and hole       | 0.444 and -0.516 e.Å <sup>-3</sup>                                               |                  |

Table 6. Crystal data and structure refinement for 7.

|                                   |                                             |                                |
|-----------------------------------|---------------------------------------------|--------------------------------|
| Empirical formula                 | $C_{26}H_{14}Cl_2F_6N_2O_2Zn$               |                                |
| Formula weight                    | 636.66                                      |                                |
| Temperature                       | 100(2) K                                    |                                |
| Wavelength                        | 1.54184 Å                                   |                                |
| Crystal system                    | Triclinic                                   |                                |
| Space group                       | P-1                                         |                                |
| Unit cell dimensions              | $a = 8.1932(8)$ Å                           | $\alpha = 112.425(13)^\circ$ . |
|                                   | $b = 12.0306(16)$ Å                         | $\beta = 91.392(9)^\circ$ .    |
|                                   | $c = 14.760(2)$ Å                           | $\gamma = 109.799(10)^\circ$ . |
| Volume                            | $1245.5(3)$ Å <sup>3</sup>                  |                                |
| Z                                 | 2                                           |                                |
| Density (calculated)              | 1.698 Mg/m <sup>3</sup>                     |                                |
| Absorption coefficient            | 4.024 mm <sup>-1</sup>                      |                                |
| F(000)                            | 636                                         |                                |
| Crystal size                      | 0.080 x 0.040 x 0.030 mm <sup>3</sup>       |                                |
| Theta range for data collection   | 4.189 to 76.579°.                           |                                |
| Index ranges                      | -10 ≤ h ≤ 10, -15 ≤ k ≤ 10, -12 ≤ l ≤ 18    |                                |
| Reflections collected             | 9457                                        |                                |
| Independent reflections           | 4945 [R(int) = 0.0417]                      |                                |
| Completeness to theta = 67.684°   | 99.3 %                                      |                                |
| Absorption correction             | Semi-empirical from equivalents             |                                |
| Max. and min. transmission        | 1.00000 and 0.90542                         |                                |
| Refinement method                 | Full-matrix least-squares on F <sup>2</sup> |                                |
| Data / restraints / parameters    | 4945 / 0 / 352                              |                                |
| Goodness-of-fit on F <sup>2</sup> | 1.051                                       |                                |
| Final R indices [I > 2σ(I)]       | R1 = 0.0480, wR2 = 0.0984                   |                                |
| R indices (all data)              | R1 = 0.0672, wR2 = 0.1062                   |                                |
| Largest diff. peak and hole       | 0.597 and -0.599 e.Å <sup>-3</sup>          |                                |

Table 7. Crystal data and structure refinement for **8**.

|                                   |                                             |                                |
|-----------------------------------|---------------------------------------------|--------------------------------|
| Empirical formula                 | $C_{52}H_{28}Cl_4F_{12}N_4Zn_2$             |                                |
| Formula weight                    | 1209.32                                     |                                |
| Temperature                       | 100(2) K                                    |                                |
| Wavelength                        | 1.54184 Å                                   |                                |
| Crystal system                    | Triclinic                                   |                                |
| Space group                       | P-1                                         |                                |
| Unit cell dimensions              | $a = 11.9861(17)$ Å                         | $\alpha = 99.188(9)^\circ$ .   |
|                                   | $b = 14.4270(17)$ Å                         | $\beta = 102.008(11)^\circ$ .  |
|                                   | $c = 16.0295(14)$ Å                         | $\gamma = 114.266(13)^\circ$ . |
| Volume                            | 2376.4(5) Å <sup>3</sup>                    |                                |
| Z                                 | 2                                           |                                |
| Density (calculated)              | 1.690 Mg/m <sup>3</sup>                     |                                |
| Absorption coefficient            | 4.116 mm <sup>-1</sup>                      |                                |
| F(000)                            | 1208                                        |                                |
| Crystal size                      | 0.10 x 0.04 x 0.03 mm <sup>3</sup>          |                                |
| Theta range for data collection   | 2.931 to 67.498°.                           |                                |
| Index ranges                      | -14 ≤ h ≤ 14, -17 ≤ k ≤ 12, -19 ≤ l ≤ 19    |                                |
| Reflections collected             | 17656                                       |                                |
| Independent reflections           | 8564 [R(int) = 0.1294]                      |                                |
| Completeness to theta = 67.498°   | 99.8 %                                      |                                |
| Absorption correction             | Semi-empirical from equivalents             |                                |
| Max. and min. transmission        | 1.00000 and 0.44297                         |                                |
| Refinement method                 | Full-matrix least-squares on F <sup>2</sup> |                                |
| Data / restraints / parameters    | 8564 / 0 / 667                              |                                |
| Goodness-of-fit on F <sup>2</sup> | 1.082                                       |                                |
| Final R indices [I > 2σ(I)]       | R1 = 0.1127, wR2 = 0.2856                   |                                |
| R indices (all data)              | R1 = 0.1975, wR2 = 0.3387                   |                                |
| Largest diff. peak and hole       | 0.851 and -1.056 e.Å <sup>-3</sup>          |                                |

Table 8. Crystal data and structure refinement for **1-DCM**.

|                                   |                                                                    |                              |
|-----------------------------------|--------------------------------------------------------------------|------------------------------|
| Empirical formula                 | $C_{33}H_{34}Cl_4N_2O_2Zn$                                         |                              |
| Formula weight                    | 697.79                                                             |                              |
| Temperature                       | 100(2) K                                                           |                              |
| Wavelength                        | 0.71075 Å                                                          |                              |
| Crystal system                    | Monoclinic                                                         |                              |
| Space group                       | $P2_1/n$                                                           |                              |
| Unit cell dimensions              | $a = 17.490(3)$ Å                                                  | $\alpha = 90^\circ$ .        |
|                                   | $b = 11.6120(17)$ Å                                                | $\beta = 117.505(3)^\circ$ . |
|                                   | $c = 17.926(3)$ Å                                                  | $\gamma = 90^\circ$ .        |
| Volume                            | $3229.2(8)$ Å <sup>3</sup>                                         |                              |
| Z                                 | 4                                                                  |                              |
| Density (calculated)              | 1.435 Mg/m <sup>3</sup>                                            |                              |
| Absorption coefficient            | $1.124$ mm <sup>-1</sup>                                           |                              |
| F(000)                            | 1440                                                               |                              |
| Crystal size                      | 0.560 x 0.220 x 0.200 mm <sup>3</sup>                              |                              |
| Theta range for data collection   | 3.105 to 24.996°.                                                  |                              |
| Index ranges                      | $-20 \leq h \leq 20$ , $-13 \leq k \leq 13$ , $-21 \leq l \leq 21$ |                              |
| Reflections collected             | 27165                                                              |                              |
| Independent reflections           | 5671 [R(int) = 0.0660]                                             |                              |
| Completeness to theta = 25.242°   | 97.4 %                                                             |                              |
| Absorption correction             | Semi-empirical from equivalents                                    |                              |
| Max. and min. transmission        | 1.00000 and 0.7151                                                 |                              |
| Refinement method                 | Full-matrix least-squares on F <sup>2</sup>                        |                              |
| Data / restraints / parameters    | 5671 / 93 / 409                                                    |                              |
| Goodness-of-fit on F <sup>2</sup> | 1.000                                                              |                              |
| Final R indices [I > 2sigma(I)]   | R1 = 0.0761, wR2 = 0.1944                                          |                              |
| R indices (all data)              | R1 = 0.0826, wR2 = 0.2013                                          |                              |
| Largest diff. peak and hole       | 2.068 and -2.158 e.Å <sup>-3</sup>                                 |                              |

Table 9. Crystal data and structure refinement for **2-DCM**.

|                                   |                                             |                              |
|-----------------------------------|---------------------------------------------|------------------------------|
| Empirical formula                 | $C_{27}H_{22}Cl_4N_2O_2Zn$                  |                              |
| Formula weight                    | 613.63                                      |                              |
| Temperature                       | 153(2) K                                    |                              |
| Wavelength                        | 0.71075 Å                                   |                              |
| Crystal system                    | Monoclinic                                  |                              |
| Space group                       | $P2_1/c$                                    |                              |
| Unit cell dimensions              | $a = 13.840(5)$ Å                           | $\alpha = 90^\circ$ .        |
|                                   | $b = 11.647(4)$ Å                           | $\beta = 111.446(4)^\circ$ . |
|                                   | $c = 17.844(6)$ Å                           | $\gamma = 90^\circ$ .        |
| Volume                            | $2677.2(15)$ Å <sup>3</sup>                 |                              |
| Z                                 | 4                                           |                              |
| Density (calculated)              | 1.522 Mg/m <sup>3</sup>                     |                              |
| Absorption coefficient            | 1.345 mm <sup>-1</sup>                      |                              |
| F(000)                            | 1248                                        |                              |
| Crystal size                      | 0.140 x 0.090 x 0.070 mm <sup>3</sup>       |                              |
| Theta range for data collection   | 2.136 to 27.474°.                           |                              |
| Index ranges                      | -17 ≤ h ≤ 17, -13 ≤ k ≤ 15, -22 ≤ l ≤ 23    |                              |
| Reflections collected             | 20087                                       |                              |
| Independent reflections           | 6116 [R(int) = 0.0522]                      |                              |
| Completeness to theta = 25.242°   | 99.8 %                                      |                              |
| Absorption correction             | Semi-empirical from equivalents             |                              |
| Max. and min. transmission        | 1.00000 and 0.5110                          |                              |
| Refinement method                 | Full-matrix least-squares on F <sup>2</sup> |                              |
| Data / restraints / parameters    | 6116 / 0 / 327                              |                              |
| Goodness-of-fit on F <sup>2</sup> | 1.045                                       |                              |
| Final R indices [I > 2σ(I)]       | R1 = 0.0348, wR2 = 0.0888                   |                              |
| R indices (all data)              | R1 = 0.0389, wR2 = 0.0918                   |                              |
| Largest diff. peak and hole       | 0.688 and -0.649 e.Å <sup>-3</sup>          |                              |



Table 10. Crystal data and structure refinement for **3-DCM**.

|                                   |                                                                                  |                    |
|-----------------------------------|----------------------------------------------------------------------------------|--------------------|
| Empirical formula                 | C <sub>27</sub> H <sub>22</sub> Cl <sub>4</sub> N <sub>2</sub> S <sub>2</sub> Zn |                    |
| Formula weight                    | 645.75                                                                           |                    |
| Temperature                       | 100(2) K                                                                         |                    |
| Wavelength                        | 0.71075 Å                                                                        |                    |
| Crystal system                    | Monoclinic                                                                       |                    |
| Space group                       | P2 <sub>1</sub> /c                                                               |                    |
| Unit cell dimensions              | a = 13.2610(2) Å                                                                 | α = 90°.           |
|                                   | b = 12.02200(10) Å                                                               | β = 109.1270(10)°. |
|                                   | c = 18.1350(2) Å                                                                 | γ = 90°.           |
| Volume                            | 2731.54(6) Å <sup>3</sup>                                                        |                    |
| Z                                 | 4                                                                                |                    |
| Density (calculated)              | 1.570 Mg/m <sup>3</sup>                                                          |                    |
| Absorption coefficient            | 1.464 mm <sup>-1</sup>                                                           |                    |
| F(000)                            | 1312                                                                             |                    |
| Crystal size                      | 0.180 x 0.170 x 0.050 mm <sup>3</sup>                                            |                    |
| Theta range for data collection   | 1.625 to 26.554°.                                                                |                    |
| Index ranges                      | -16 ≤ h ≤ 16, -14 ≤ k ≤ 14, -22 ≤ l ≤ 22                                         |                    |
| Reflections collected             | 16166                                                                            |                    |
| Independent reflections           | 5505 [R(int) = 0.0318]                                                           |                    |
| Completeness to theta = 25.242°   | 99.6 %                                                                           |                    |
| Absorption correction             | Semi-empirical from equivalents                                                  |                    |
| Max. and min. transmission        | 1.00000 and 0.77049                                                              |                    |
| Refinement method                 | Full-matrix least-squares on F <sup>2</sup>                                      |                    |
| Data / restraints / parameters    | 5505 / 294 / 356                                                                 |                    |
| Goodness-of-fit on F <sup>2</sup> | 1.237                                                                            |                    |
| Final R indices [I > 2σ(I)]       | R1 = 0.0711, wR2 = 0.1747                                                        |                    |
| R indices (all data)              | R1 = 0.0718, wR2 = 0.1750                                                        |                    |
| Largest diff. peak and hole       | 0.543 and -0.945 e.Å <sup>-3</sup>                                               |                    |

Table 11. Crystal data and structure refinement for **4-DCM**.

|                                   |                                             |                              |
|-----------------------------------|---------------------------------------------|------------------------------|
| Empirical formula                 | $C_{36.37}H_{24.74}Cl_{2.74}N_2O_2Zn$       |                              |
| Formula weight                    | 1369.38                                     |                              |
| Temperature                       | 100(2) K                                    |                              |
| Wavelength                        | 0.71075 Å                                   |                              |
| Crystal system                    | Monoclinic                                  |                              |
| Space group                       | I2/a                                        |                              |
| Unit cell dimensions              | $a = 17.442(7)$ Å                           | $\alpha = 90^\circ$ .        |
|                                   | $b = 11.790(5)$ Å                           | $\beta = 104.238(7)^\circ$ . |
|                                   | $c = 31.054(15)$ Å                          | $\gamma = 90^\circ$ .        |
| Volume                            | $6190(5)$ Å <sup>3</sup>                    |                              |
| Z                                 | 4                                           |                              |
| Density (calculated)              | 1.469 Mg/m <sup>3</sup>                     |                              |
| Absorption coefficient            | 1.068 mm <sup>-1</sup>                      |                              |
| F(000)                            | 2798                                        |                              |
| Crystal size                      | 0.05 x 0.21 x 0.27 mm <sup>3</sup>          |                              |
| Theta range for data collection   | 1.855 to 24.998°.                           |                              |
| Index ranges                      | -20 ≤ h ≤ 20, -14 ≤ k ≤ 13, -36 ≤ l ≤ 36    |                              |
| Reflections collected             | 39380                                       |                              |
| Independent reflections           | 5446 [R(int) = 0.0481]                      |                              |
| Completeness to theta = 25.242°   | 97.1 %                                      |                              |
| Absorption correction             | Semi-empirical from equivalents             |                              |
| Max. and min. transmission        | 1.00000 and 0.7810                          |                              |
| Refinement method                 | Full-matrix least-squares on F <sup>2</sup> |                              |
| Data / restraints / parameters    | 5446 / 879 / 527                            |                              |
| Goodness-of-fit on F <sup>2</sup> | 1.225                                       |                              |
| Final R indices [I > 2σ(I)]       | R1 = 0.0637, wR2 = 0.1751                   |                              |
| R indices (all data)              | R1 = 0.0675, wR2 = 0.1788                   |                              |
| Largest diff. peak and hole       | 1.510 and -0.574 e.Å <sup>-3</sup>          |                              |

Table 12. Crystal data and structure refinement for **5-THF**.

|                                   |                                             |                              |
|-----------------------------------|---------------------------------------------|------------------------------|
| Empirical formula                 | $C_{30}H_{26}Cl_2F_2N_2O_{1.5}Zn$           |                              |
| Formula weight                    | 1225.59                                     |                              |
| Temperature                       | 153(2) K                                    |                              |
| Wavelength                        | 0.71075 Å                                   |                              |
| Crystal system                    | Monoclinic                                  |                              |
| Space group                       | $P2_1/c$                                    |                              |
| Unit cell dimensions              | $a = 14.3180(15)$ Å                         | $\alpha = 90^\circ$ .        |
|                                   | $b = 11.7050(8)$ Å                          | $\beta = 112.958(4)^\circ$ . |
|                                   | $c = 17.7720(18)$ Å                         | $\gamma = 90^\circ$ .        |
| Volume                            | $2742.5(4)$ Å <sup>3</sup>                  |                              |
| Z                                 | 2                                           |                              |
| Density (calculated)              | 1.484 Mg/m <sup>3</sup>                     |                              |
| Absorption coefficient            | 1.133 mm <sup>-1</sup>                      |                              |
| F(000)                            | 1256                                        |                              |
| Crystal size                      | 0.230 x 0.110 x 0.090 mm <sup>3</sup>       |                              |
| Theta range for data collection   | 2.139 to 27.500°.                           |                              |
| Index ranges                      | -18 ≤ h ≤ 18, -15 ≤ k ≤ 15, -23 ≤ l ≤ 22    |                              |
| Reflections collected             | 28653                                       |                              |
| Independent reflections           | 6289 [R(int) = 0.0641]                      |                              |
| Completeness to theta = 25.242°   | 99.7 %                                      |                              |
| Absorption correction             | Semi-empirical from equivalents             |                              |
| Max. and min. transmission        | 1.00000 and 0.7994                          |                              |
| Refinement method                 | Full-matrix least-squares on F <sup>2</sup> |                              |
| Data / restraints / parameters    | 6289 / 672 / 417                            |                              |
| Goodness-of-fit on F <sup>2</sup> | 1.070                                       |                              |
| Final R indices [I > 2σ(I)]       | R1 = 0.0518, wR2 = 0.1089                   |                              |
| R indices (all data)              | R1 = 0.0732, wR2 = 0.1248                   |                              |
| Largest diff. peak and hole       | 0.448 and -0.494 e.Å <sup>-3</sup>          |                              |

Table 13. Crystal data and structure refinement for **6-DCM**.

|                                   |                                                                    |                                |
|-----------------------------------|--------------------------------------------------------------------|--------------------------------|
| Empirical formula                 | $C_{25}H_{16}Br_2Cl_4N_2Zn$                                        |                                |
| Formula weight                    | 711.39                                                             |                                |
| Temperature                       | 100(2) K                                                           |                                |
| Wavelength                        | 1.54184 Å                                                          |                                |
| Crystal system                    | Monoclinic                                                         |                                |
| Space group                       | $P2_1/c$                                                           |                                |
| Unit cell dimensions              | $a = 13.10500(10)$ Å                                               | $\alpha = 90^\circ$ .          |
|                                   | $b = 11.84230(10)$ Å                                               | $\beta = 110.0250(10)^\circ$ . |
|                                   | $c = 17.5235(2)$ Å                                                 | $\gamma = 90^\circ$ .          |
| Volume                            | $2555.12(4)$ Å <sup>3</sup>                                        |                                |
| Z                                 | 4                                                                  |                                |
| Density (calculated)              | 1.849 Mg/m <sup>3</sup>                                            |                                |
| Absorption coefficient            | $8.994$ mm <sup>-1</sup>                                           |                                |
| F(000)                            | 1392                                                               |                                |
| Crystal size                      | 0.140 x 0.060 x 0.030 mm <sup>3</sup>                              |                                |
| Theta range for data collection   | 3.590 to 76.359°.                                                  |                                |
| Index ranges                      | $-16 \leq h \leq 16$ , $-14 \leq k \leq 13$ , $-21 \leq l \leq 21$ |                                |
| Reflections collected             | 25415                                                              |                                |
| Independent reflections           | 5292 [R(int) = 0.0273]                                             |                                |
| Completeness to theta = 67.684°   | 100.0 %                                                            |                                |
| Absorption correction             | Semi-empirical from equivalents                                    |                                |
| Max. and min. transmission        | 1.00000 and 0.59098                                                |                                |
| Refinement method                 | Full-matrix least-squares on F <sup>2</sup>                        |                                |
| Data / restraints / parameters    | 5292 / 0 / 307                                                     |                                |
| Goodness-of-fit on F <sup>2</sup> | 1.086                                                              |                                |
| Final R indices [I > 2sigma(I)]   | R1 = 0.0250, wR2 = 0.0682                                          |                                |
| R indices (all data)              | R1 = 0.0260, wR2 = 0.0691                                          |                                |
| Largest diff. peak and hole       | 0.511 and -0.432 e.Å <sup>-3</sup>                                 |                                |

Table 14. Crystal data and structure refinement for **7-DCM**.

|                                   |                                             |                               |
|-----------------------------------|---------------------------------------------|-------------------------------|
| Empirical formula                 | $C_{27}H_{16}Cl_4F_6N_2O_2Zn$               |                               |
| Formula weight                    | 721.59                                      |                               |
| Temperature                       | 100(2) K                                    |                               |
| Wavelength                        | 1.54184 Å                                   |                               |
| Crystal system                    | Triclinic                                   |                               |
| Space group                       | P-1                                         |                               |
| Unit cell dimensions              | $a = 11.8689(6)$ Å                          | $\alpha = 107.262(7)^\circ$ . |
|                                   | $b = 14.1948(11)$ Å                         | $\beta = 92.978(5)^\circ$ .   |
|                                   | $c = 17.6232(16)$ Å                         | $\gamma = 94.504(5)^\circ$ .  |
| Volume                            | $2817.8(4)$ Å <sup>3</sup>                  |                               |
| Z                                 | 4                                           |                               |
| Density (calculated)              | 1.701 Mg/m <sup>3</sup>                     |                               |
| Absorption coefficient            | 5.342 mm <sup>-1</sup>                      |                               |
| F(000)                            | 1440                                        |                               |
| Crystal size                      | 0.10 x 0.25 x 0.38 mm <sup>3</sup>          |                               |
| Theta range for data collection   | 3.530 to 76.980°.                           |                               |
| Index ranges                      | -14 ≤ h ≤ 12, -17 ≤ k ≤ 17, -21 ≤ l ≤ 21    |                               |
| Reflections collected             | 17297                                       |                               |
| Independent reflections           | 17297 [R(int) = 0.0000]                     |                               |
| Completeness to theta = 67.684°   | 99.8 %                                      |                               |
| Absorption correction             | Semi-empirical from equivalents             |                               |
| Max. and min. transmission        | 1.00000 and 0.45025                         |                               |
| Refinement method                 | Full-matrix least-squares on F <sup>2</sup> |                               |
| Data / restraints / parameters    | 17297 / 702 / 758                           |                               |
| Goodness-of-fit on F <sup>2</sup> | 1.060                                       |                               |
| Final R indices [I > 2σ(I)]       | R1 = 0.0877, wR2 = 0.2289                   |                               |
| R indices (all data)              | R1 = 0.1073, wR2 = 0.2449                   |                               |
| Largest diff. peak and hole       | 2.192 and -1.217 e.Å <sup>-3</sup>          |                               |

Table 15. Crystal data and structure refinement for **8-DCM**.

|                                   |                                                                                  |                  |
|-----------------------------------|----------------------------------------------------------------------------------|------------------|
| Empirical formula                 | C <sub>27</sub> H <sub>16</sub> Cl <sub>4</sub> F <sub>6</sub> N <sub>2</sub> Zn |                  |
| Formula weight                    | 689.59                                                                           |                  |
| Temperature                       | 100(2) K                                                                         |                  |
| Wavelength                        | 1.54184 Å                                                                        |                  |
| Crystal system                    | Monoclinic                                                                       |                  |
| Space group                       | P2 <sub>1</sub> /c                                                               |                  |
| Unit cell dimensions              | a = 13.7395(5) Å                                                                 | α = 90°.         |
|                                   | b = 11.9489(3) Å                                                                 | β = 111.023(4)°. |
|                                   | c = 17.6137(5) Å                                                                 | γ = 90°.         |
| Volume                            | 2699.19(16) Å <sup>3</sup>                                                       |                  |
| Z                                 | 4                                                                                |                  |
| Density (calculated)              | 1.697 Mg/m <sup>3</sup>                                                          |                  |
| Absorption coefficient            | 5.486 mm <sup>-1</sup>                                                           |                  |
| F(000)                            | 1376                                                                             |                  |
| Crystal size                      | 0.420 x 0.090 x 0.080 mm <sup>3</sup>                                            |                  |
| Theta range for data collection   | 4.575 to 76.256°.                                                                |                  |
| Index ranges                      | -17 ≤ h ≤ 11, -13 ≤ k ≤ 14, -15 ≤ l ≤ 21                                         |                  |
| Reflections collected             | 10491                                                                            |                  |
| Independent reflections           | 5421 [R(int) = 0.0313]                                                           |                  |
| Completeness to theta = 67.684°   | 99.4 %                                                                           |                  |
| Absorption correction             | Semi-empirical from equivalents                                                  |                  |
| Max. and min. transmission        | 1.00000 and 0.50168                                                              |                  |
| Refinement method                 | Full-matrix least-squares on F <sup>2</sup>                                      |                  |
| Data / restraints / parameters    | 5421 / 366 / 390                                                                 |                  |
| Goodness-of-fit on F <sup>2</sup> | 0.980                                                                            |                  |
| Final R indices [I > 2σ(I)]       | R1 = 0.0415, wR2 = 0.1110                                                        |                  |
| R indices (all data)              | R1 = 0.0458, wR2 = 0.1160                                                        |                  |
| Largest diff. peak and hole       | 0.434 and -0.688 e.Å <sup>-3</sup>                                               |                  |

## 4) TD-DFT Calculated Excitations

### 4-OMe (2)

Number of loops in Davidson routine = 26  
Number of matrix-vector multiplications = 1050  
Type of excitations = SINGLET-SINGLET

Symmetry A

Excitation energies E in a.u. and eV, dE wrt prev. cycle,  
oscillator strengths f in a.u.

| no. | E/a.u.      | E/eV   | f           | dE/a.u.  |
|-----|-------------|--------|-------------|----------|
| 1   | 0.69882E-01 | 1.9016 | 0.15468     | 0.23E-09 |
| 2   | 0.70159E-01 | 1.9091 | 0.74517E-01 | 0.31E-09 |
| 3   | 0.73685E-01 | 2.0051 | 0.20537E-01 | 0.10E-10 |
| 4   | 0.73877E-01 | 2.0103 | 0.58340E-02 | 0.14E-09 |
| 5   | 0.80127E-01 | 2.1804 | 0.12078E-01 | 0.78E-10 |
| 6   | 0.82517E-01 | 2.2454 | 0.13986E-01 | 0.10E-09 |
| 7   | 0.88003E-01 | 2.3947 | 0.13135E-01 | 0.58E-11 |
| 8   | 0.90943E-01 | 2.4747 | 0.86997E-01 | 0.91E-09 |
| 9   | 0.91775E-01 | 2.4973 | 0.25968E-01 | 0.21E-09 |
| 10  | 0.92919E-01 | 2.5285 | 0.44400E-04 | 0.23E-10 |
| 11  | 0.97532E-01 | 2.6540 | 0.13177E-01 | 0.47E-09 |
| 12  | 0.10139     | 2.7591 | 0.34997E-01 | 0.48E-10 |
| 13  | 0.10182     | 2.7706 | 0.11352E-01 | 0.99E-10 |
| 14  | 0.10690     | 2.9089 | 0.10860E-02 | 0.11E-09 |
| 15  | 0.10778     | 2.9330 | 0.10902E-01 | 0.11E-09 |
| 16  | 0.10887     | 2.9625 | 0.67617E-01 | 0.11E-08 |
| 17  | 0.11844     | 3.2230 | 0.21566E-02 | 0.69E-09 |
| 18  | 0.12054     | 3.2799 | 0.14280E-01 | 0.23E-09 |
| 19  | 0.12450     | 3.3877 | 0.12075E-02 | 0.66E-09 |
| 20  | 0.12489     | 3.3985 | 0.12931E-01 | 0.71E-09 |
| 21  | 0.12504     | 3.4026 | 0.33070E-02 | 0.63E-10 |
| 22  | 0.12715     | 3.4600 | 0.66715E-02 | 0.15E-09 |
| 23  | 0.12771     | 3.4752 | 0.40331E-01 | 0.28E-08 |
| 24  | 0.13666     | 3.7186 | 0.17285E-04 | 0.45E-09 |
| 25  | 0.13759     | 3.7440 | 0.48803E-03 | 0.95E-10 |
| 26  | 0.14034     | 3.8190 | 0.20054E-03 | 0.26E-09 |
| 27  | 0.14062     | 3.8264 | 0.28036E-01 | 0.14E-08 |
| 28  | 0.14182     | 3.8590 | 0.93906E-04 | 0.11E-10 |
| 29  | 0.14526     | 3.9527 | 0.54086E-02 | 0.52E-10 |
| 30  | 0.14586     | 3.9691 | 0.55303E-02 | 0.32E-09 |
| 31  | 0.14700     | 4.0002 | 0.14494E-01 | 0.72E-09 |
| 32  | 0.15000     | 4.0816 | 0.18668E-02 | 0.17E-09 |
| 33  | 0.15119     | 4.1141 | 0.68900E-02 | 0.24E-09 |
| 34  | 0.15237     | 4.1463 | 0.74877E-03 | 0.98E-10 |
| 35  | 0.15315     | 4.1675 | 0.98616E-01 | 0.20E-09 |
| 36  | 0.15380     | 4.1851 | 0.12729     | 0.34E-09 |
| 37  | 0.15631     | 4.2534 | 0.10323E-02 | 0.93E-10 |
| 38  | 0.15675     | 4.2654 | 0.10288E-02 | 0.11E-09 |
| 39  | 0.15735     | 4.2817 | 0.19519E-01 | 0.14E-08 |
| 40  | 0.15743     | 4.2838 | 0.25590E-01 | 0.17E-08 |
| 41  | 0.15758     | 4.2880 | 0.10730E-01 | 0.10E-08 |
| 42  | 0.15838     | 4.3097 | 0.14567E-01 | 0.67E-09 |
| 43  | 0.16236     | 4.4181 | 0.55033E-01 | 0.71E-09 |
| 44  | 0.16282     | 4.4306 | 0.38170E-01 | 0.49E-09 |
| 45  | 0.16305     | 4.4367 | 0.41826E-02 | 0.37E-09 |
| 46  | 0.16447     | 4.4755 | 0.17241E-02 | 0.19E-08 |
| 47  | 0.16543     | 4.5015 | 0.71855E-05 | 0.24E-07 |

|    |         |        |             |          |
|----|---------|--------|-------------|----------|
| 48 | 0.16665 | 4.5347 | 0.18969E-01 | 0.12E-07 |
| 49 | 0.16799 | 4.5713 | 0.34943E-01 | 0.91E-06 |
| 50 | 0.16836 | 4.5813 | 0.15508E-01 | 0.76E-07 |

### 4-SMe (3)

Number of loops in Davidson routine = 16  
 Number of matrix-vector multiplications = 650  
 Type of excitations = SINGLET-SINGLET

Symmetry A

Excitation energies E in a.u. and eV, dE wrt prev. cycle,  
 oscillator strengths f in a.u.

| no. | E/a.u.      | E/eV   | f           | dE/a.u.  |
|-----|-------------|--------|-------------|----------|
| 1   | 0.59012E-01 | 1.6058 | 0.34922     | 0.20E-08 |
| 2   | 0.64634E-01 | 1.7588 | 0.11738E-01 | 0.38E-09 |
| 3   | 0.71225E-01 | 1.9381 | 0.43356E-02 | 0.47E-10 |
| 4   | 0.74191E-01 | 2.0188 | 0.61286E-02 | 0.12E-09 |
| 5   | 0.74256E-01 | 2.0206 | 0.60564E-01 | 0.25E-09 |
| 6   | 0.78545E-01 | 2.1373 | 0.26957E-01 | 0.19E-09 |
| 7   | 0.79328E-01 | 2.1586 | 0.85101E-01 | 0.12E-08 |
| 8   | 0.82759E-01 | 2.2520 | 0.65061E-02 | 0.23E-09 |
| 9   | 0.90586E-01 | 2.4650 | 0.15342E-02 | 0.15E-10 |
| 10  | 0.93880E-01 | 2.5546 | 0.74074E-03 | 0.31E-08 |
| 11  | 0.94029E-01 | 2.5587 | 0.94880E-03 | 0.56E-10 |
| 12  | 0.96595E-01 | 2.6285 | 0.22097E-02 | 0.14E-09 |
| 13  | 0.10244     | 2.7875 | 0.15069E-02 | 0.16E-09 |
| 14  | 0.10719     | 2.9167 | 0.26941E-02 | 0.28E-08 |
| 15  | 0.10804     | 2.9399 | 0.80050E-02 | 0.52E-09 |
| 16  | 0.10925     | 2.9728 | 0.46795E-01 | 0.34E-09 |
| 17  | 0.11505     | 3.1308 | 0.14797E-02 | 0.73E-09 |
| 18  | 0.11651     | 3.1704 | 0.46495E-04 | 0.17E-09 |
| 19  | 0.11723     | 3.1900 | 0.77722E-02 | 0.57E-09 |
| 20  | 0.11776     | 3.2043 | 0.52604E-02 | 0.12E-08 |
| 21  | 0.12012     | 3.2686 | 0.50020E-01 | 0.67E-09 |
| 22  | 0.12554     | 3.4162 | 0.89526E-03 | 0.66E-10 |
| 23  | 0.12594     | 3.4269 | 0.14989E-02 | 0.76E-09 |
| 24  | 0.12674     | 3.4487 | 0.55326E-03 | 0.13E-09 |
| 25  | 0.12713     | 3.4594 | 0.64807E-03 | 0.26E-08 |
| 26  | 0.13255     | 3.6067 | 0.19997E-02 | 0.61E-09 |
| 27  | 0.13343     | 3.6309 | 0.47697E-02 | 0.33E-09 |
| 28  | 0.13378     | 3.6403 | 0.15334E-02 | 0.63E-09 |
| 29  | 0.13572     | 3.6932 | 0.87127E-01 | 0.24E-08 |
| 30  | 0.13664     | 3.7183 | 0.77600E-01 | 0.13E-08 |
| 31  | 0.13981     | 3.8045 | 0.19707E-03 | 0.11E-09 |
| 32  | 0.14277     | 3.8850 | 0.29021E-01 | 0.49E-09 |
| 33  | 0.14309     | 3.8937 | 0.10369E-01 | 0.19E-09 |
| 34  | 0.14354     | 3.9058 | 0.31648E-01 | 0.11E-08 |
| 35  | 0.14481     | 3.9404 | 0.31313E-01 | 0.37E-08 |
| 36  | 0.14554     | 3.9602 | 0.22668E-01 | 0.20E-08 |
| 37  | 0.14566     | 3.9637 | 0.43479E-02 | 0.12E-08 |
| 38  | 0.14604     | 3.9739 | 0.17334E-01 | 0.36E-08 |
| 39  | 0.14956     | 4.0698 | 0.22140E-01 | 0.65E-08 |
| 40  | 0.15174     | 4.1290 | 0.53361E-02 | 0.28E-09 |
| 41  | 0.15258     | 4.1519 | 0.37347E-03 | 0.91E-10 |
| 42  | 0.15346     | 4.1759 | 0.18159     | 0.19E-08 |
| 43  | 0.15387     | 4.1870 | 0.54142E-02 | 0.19E-09 |
| 44  | 0.15535     | 4.2272 | 0.20217E-01 | 0.17E-07 |
| 45  | 0.15593     | 4.2431 | 0.13497E-02 | 0.40E-08 |
| 46  | 0.15662     | 4.2618 | 0.26698E-01 | 0.47E-09 |
| 47  | 0.15699     | 4.2720 | 0.21237E-02 | 0.66E-06 |
| 48  | 0.15854     | 4.3140 | 0.31555E-01 | 0.23E-06 |



```

49 0.15859      4.3155      0.44198E-01  0.93E-07
50 0.15981      4.3487      0.24116E-02  0.10E-06

```

### 4-F (5)

```

Number of loops in Davidson routine      =   13
Number of matrix-vector multiplications =   530
Type of excitations = SINGLET-SINGLET

```

Symmetry A

Excitation energies E in a.u. and eV, dE wrt prev. cycle,  
oscillator strengths f in a.u.

| no. | E/a.u.      | E/eV   | f           | dE/a.u.  |
|-----|-------------|--------|-------------|----------|
| 1   | 0.67092E-01 | 1.8257 | 0.41110E-02 | 0.45E-09 |
| 2   | 0.69496E-01 | 1.8911 | 0.25734E-02 | 0.89E-10 |
| 3   | 0.72281E-01 | 1.9669 | 0.22728E-02 | 0.26E-09 |
| 4   | 0.76963E-01 | 2.0943 | 0.71202E-01 | 0.52E-09 |
| 5   | 0.82119E-01 | 2.2346 | 0.74853E-01 | 0.11E-08 |
| 6   | 0.87293E-01 | 2.3754 | 0.28388E-02 | 0.57E-10 |
| 7   | 0.89676E-01 | 2.4402 | 0.38368E-02 | 0.27E-08 |
| 8   | 0.92210E-01 | 2.5092 | 0.36461E-03 | 0.68E-09 |
| 9   | 0.92260E-01 | 2.5105 | 0.33205E-02 | 0.15E-09 |
| 10  | 0.97455E-01 | 2.6519 | 0.23474E-01 | 0.12E-08 |
| 11  | 0.98331E-01 | 2.6757 | 0.41251E-01 | 0.13E-08 |
| 12  | 0.10212     | 2.7789 | 0.16458E-01 | 0.46E-09 |
| 13  | 0.10665     | 2.9020 | 0.71645E-01 | 0.58E-08 |
| 14  | 0.10804     | 2.9400 | 0.26025E-01 | 0.96E-09 |
| 15  | 0.10855     | 2.9537 | 0.10307E-02 | 0.27E-09 |
| 16  | 0.11179     | 3.0421 | 0.28453E-01 | 0.84E-09 |
| 17  | 0.11660     | 3.1730 | 0.26052E-02 | 0.87E-08 |
| 18  | 0.12106     | 3.2941 | 0.30659E-01 | 0.37E-08 |
| 19  | 0.12417     | 3.3788 | 0.28245E-03 | 0.26E-09 |
| 20  | 0.12648     | 3.4416 | 0.27770E-01 | 0.55E-08 |
| 21  | 0.12803     | 3.4839 | 0.23463E-02 | 0.34E-09 |
| 22  | 0.12966     | 3.5282 | 0.30494E-01 | 0.54E-08 |
| 23  | 0.13630     | 3.7088 | 0.19716E-03 | 0.42E-09 |
| 24  | 0.13732     | 3.7366 | 0.17342E-04 | 0.33E-09 |
| 25  | 0.13937     | 3.7924 | 0.23197E-02 | 0.45E-09 |
| 26  | 0.14095     | 3.8355 | 0.67402E-05 | 0.22E-09 |
| 27  | 0.14117     | 3.8416 | 0.33571E-04 | 0.40E-09 |
| 28  | 0.14729     | 4.0079 | 0.11049E-01 | 0.20E-08 |
| 29  | 0.14753     | 4.0146 | 0.75690E-02 | 0.41E-08 |
| 30  | 0.14874     | 4.0473 | 0.28248E-03 | 0.31E-09 |
| 31  | 0.15033     | 4.0907 | 0.19502E-02 | 0.51E-10 |
| 32  | 0.15075     | 4.1021 | 0.38434E-01 | 0.22E-08 |
| 33  | 0.15118     | 4.1138 | 0.87858E-02 | 0.62E-09 |
| 34  | 0.15263     | 4.1531 | 0.17295E-01 | 0.31E-08 |
| 35  | 0.15279     | 4.1575 | 0.12585E-01 | 0.54E-08 |
| 36  | 0.15332     | 4.1720 | 0.27730E-04 | 0.19E-09 |
| 37  | 0.15584     | 4.2406 | 0.96305E-02 | 0.20E-08 |
| 38  | 0.15658     | 4.2606 | 0.27486E-03 | 0.16E-08 |
| 39  | 0.15855     | 4.3143 | 0.24831     | 0.33E-07 |
| 40  | 0.16074     | 4.3739 | 0.29945E-03 | 0.26E-08 |
| 41  | 0.16132     | 4.3898 | 0.40644E-01 | 0.15E-07 |
| 42  | 0.16208     | 4.4103 | 0.68166E-03 | 0.22E-08 |
| 43  | 0.16213     | 4.4118 | 0.54285E-03 | 0.20E-09 |
| 44  | 0.16371     | 4.4548 | 0.80711E-02 | 0.22E-08 |
| 45  | 0.16554     | 4.5047 | 0.65959E-02 | 0.97E-06 |
| 46  | 0.16609     | 4.5196 | 0.13768E-01 | 0.16E-07 |
| 47  | 0.16654     | 4.5316 | 0.24966E-01 | 0.50E-07 |
| 48  | 0.16668     | 4.5356 | 0.42916E-02 | 0.44E-06 |
| 49  | 0.16753     | 4.5588 | 0.12135E-02 | 0.32E-08 |

50 0.16800 4.5716 0.97357E-03 0.63E-06

### 4-Br (6)

Number of loops in Davidson routine = 15  
Number of matrix-vector multiplications = 610  
Type of excitations = SINGLET-SINGLET

### 4-CF<sub>3</sub> (8)

Symmetry A

Excitation energies E in a.u. and eV, dE wrt prev. cycle,  
oscillator strengths f in a.u.

| no. | E/a.u.      | E/eV   | f           | dE/a.u.  |
|-----|-------------|--------|-------------|----------|
| 1   | 0.67512E-01 | 1.8371 | 0.52932E-02 | 0.16E-08 |
| 2   | 0.69793E-01 | 1.8992 | 0.37656E-01 | 0.62E-09 |
| 3   | 0.72296E-01 | 1.9673 | 0.29492E-02 | 0.22E-08 |
| 4   | 0.72958E-01 | 1.9853 | 0.17454     | 0.18E-08 |
| 5   | 0.80817E-01 | 2.1992 | 0.22735E-01 | 0.59E-09 |
| 6   | 0.84188E-01 | 2.2909 | 0.15284E-02 | 0.59E-09 |
| 7   | 0.87502E-01 | 2.3810 | 0.62994E-02 | 0.22E-09 |
| 8   | 0.90285E-01 | 2.4568 | 0.62702E-01 | 0.46E-09 |
| 9   | 0.92150E-01 | 2.5075 | 0.91347E-02 | 0.26E-09 |
| 10  | 0.92293E-01 | 2.5114 | 0.59367E-02 | 0.61E-10 |
| 11  | 0.94892E-01 | 2.5821 | 0.76168E-02 | 0.31E-08 |
| 12  | 0.10184     | 2.7711 | 0.39287E-02 | 0.45E-10 |
| 13  | 0.10309     | 2.8052 | 0.29243E-01 | 0.44E-09 |
| 14  | 0.10600     | 2.8845 | 0.15431E-02 | 0.18E-09 |
| 15  | 0.10656     | 2.8998 | 0.93712E-04 | 0.38E-09 |
| 16  | 0.10731     | 2.9201 | 0.63166E-01 | 0.19E-08 |
| 17  | 0.10921     | 2.9716 | 0.41037E-02 | 0.74E-10 |
| 18  | 0.10933     | 2.9750 | 0.70286E-02 | 0.24E-09 |
| 19  | 0.11612     | 3.1598 | 0.30266E-02 | 0.58E-09 |
| 20  | 0.11629     | 3.1644 | 0.56458E-02 | 0.10E-08 |
| 21  | 0.12407     | 3.3761 | 0.29000E-01 | 0.32E-08 |
| 22  | 0.12517     | 3.4060 | 0.77859E-05 | 0.23E-09 |
| 23  | 0.12626     | 3.4356 | 0.81291E-04 | 0.68E-09 |
| 24  | 0.12637     | 3.4387 | 0.16450E-02 | 0.14E-09 |
| 25  | 0.12708     | 3.4581 | 0.10030E-01 | 0.91E-09 |
| 26  | 0.13047     | 3.5504 | 0.22846E-03 | 0.19E-10 |
| 27  | 0.13049     | 3.5509 | 0.78263E-04 | 0.25E-10 |
| 28  | 0.13432     | 3.6550 | 0.58417E-03 | 0.39E-09 |
| 29  | 0.13594     | 3.6991 | 0.29770E-04 | 0.16E-09 |
| 30  | 0.13659     | 3.7168 | 0.41407E-04 | 0.40E-09 |
| 31  | 0.14116     | 3.8411 | 0.17030E-01 | 0.98E-09 |
| 32  | 0.14127     | 3.8441 | 0.91638E-03 | 0.14E-09 |
| 33  | 0.14138     | 3.8471 | 0.11458     | 0.44E-08 |
| 34  | 0.14601     | 3.9731 | 0.10816E-02 | 0.19E-08 |
| 35  | 0.14636     | 3.9827 | 0.25065E-01 | 0.14E-07 |
| 36  | 0.14826     | 4.0345 | 0.18057E-03 | 0.15E-09 |
| 37  | 0.14860     | 4.0437 | 0.24806E-02 | 0.64E-08 |
| 38  | 0.15092     | 4.1068 | 0.52275E-03 | 0.11E-09 |
| 39  | 0.15111     | 4.1118 | 0.83202E-03 | 0.32E-09 |
| 40  | 0.15152     | 4.1230 | 0.17654E-02 | 0.21E-08 |
| 41  | 0.15233     | 4.1450 | 0.10299E-02 | 0.95E-09 |
| 42  | 0.15385     | 4.1865 | 0.97788E-04 | 0.16E-08 |
| 43  | 0.15434     | 4.1999 | 0.69800E-05 | 0.29E-09 |
| 44  | 0.15488     | 4.2144 | 0.42712E-01 | 0.67E-08 |
| 45  | 0.15596     | 4.2438 | 0.99417E-02 | 0.69E-09 |
| 46  | 0.15613     | 4.2484 | 0.86855E-02 | 0.98E-09 |
| 47  | 0.15644     | 4.2569 | 0.41130E-01 | 0.11E-08 |
| 48  | 0.15685     | 4.2680 | 0.23999E-01 | 0.14E-08 |
| 49  | 0.15859     | 4.3154 | 0.65215E-01 | 0.78E-07 |
| 50  | 0.15913     | 4.3302 | 0.11039E-01 | 0.65E-06 |

Number of loops in Davidson routine = 18  
 Number of matrix-vector multiplications = 730  
 Type of excitations = SINGLET-SINGLET

Symmetry A

Excitation energies E in a.u. and eV, dE wrt prev. cycle,  
 oscillator strengths f in a.u.

| no. | E/a.u.      | E/eV   | f           | dE/a.u.  |
|-----|-------------|--------|-------------|----------|
| 1   | 0.67270E-01 | 1.8305 | 0.42066E-02 | 0.96E-10 |
| 2   | 0.69608E-01 | 1.8941 | 0.11157E-02 | 0.98E-11 |
| 3   | 0.72124E-01 | 1.9626 | 0.16858E-02 | 0.70E-10 |
| 4   | 0.77855E-01 | 2.1186 | 0.18504E-01 | 0.65E-10 |
| 5   | 0.85186E-01 | 2.3180 | 0.90765E-01 | 0.72E-09 |
| 6   | 0.88362E-01 | 2.4045 | 0.39194E-02 | 0.15E-10 |
| 7   | 0.91587E-01 | 2.4922 | 0.27949E-02 | 0.75E-10 |
| 8   | 0.92953E-01 | 2.5294 | 0.17040E-02 | 0.27E-10 |
| 9   | 0.96792E-01 | 2.6338 | 0.21310E-01 | 0.41E-09 |
| 10  | 0.97301E-01 | 2.6477 | 0.83514E-02 | 0.26E-09 |
| 11  | 0.10018     | 2.7261 | 0.12241E-01 | 0.31E-09 |
| 12  | 0.10244     | 2.7874 | 0.37122E-02 | 0.29E-09 |
| 13  | 0.10366     | 2.8208 | 0.18001E-02 | 0.11E-09 |
| 14  | 0.10532     | 2.8658 | 0.60726E-02 | 0.29E-09 |
| 15  | 0.10824     | 2.9454 | 0.10404     | 0.66E-09 |
| 16  | 0.11567     | 3.1476 | 0.39591E-02 | 0.11E-08 |
| 17  | 0.11758     | 3.1996 | 0.19225E-01 | 0.15E-09 |
| 18  | 0.12230     | 3.3278 | 0.76116E-02 | 0.45E-09 |
| 19  | 0.12326     | 3.3541 | 0.24620E-01 | 0.53E-09 |
| 20  | 0.12352     | 3.3611 | 0.48562E-02 | 0.19E-09 |
| 21  | 0.12626     | 3.4358 | 0.89996E-03 | 0.47E-10 |
| 22  | 0.12847     | 3.4958 | 0.52959E-01 | 0.34E-08 |
| 23  | 0.13758     | 3.7437 | 0.26405E-03 | 0.15E-09 |
| 24  | 0.14015     | 3.8136 | 0.19441E-02 | 0.16E-09 |
| 25  | 0.14171     | 3.8562 | 0.46952E-02 | 0.10E-08 |
| 26  | 0.14215     | 3.8681 | 0.14613E-04 | 0.15E-09 |
| 27  | 0.14408     | 3.9207 | 0.38523E-02 | 0.15E-08 |
| 28  | 0.14840     | 4.0381 | 0.62133E-02 | 0.36E-09 |
| 29  | 0.14956     | 4.0696 | 0.23217E-02 | 0.76E-10 |
| 30  | 0.14980     | 4.0764 | 0.23091E-02 | 0.87E-10 |
| 31  | 0.15235     | 4.1457 | 0.22962E-02 | 0.36E-09 |
| 32  | 0.15264     | 4.1535 | 0.11767E-01 | 0.15E-09 |
| 33  | 0.15312     | 4.1667 | 0.56982E-01 | 0.12E-08 |
| 34  | 0.15372     | 4.1830 | 0.40859E-02 | 0.39E-10 |
| 35  | 0.15418     | 4.1955 | 0.12607E-02 | 0.84E-10 |
| 36  | 0.15443     | 4.2022 | 0.26754E-02 | 0.12E-09 |
| 37  | 0.15523     | 4.2241 | 0.13122E-03 | 0.46E-10 |
| 38  | 0.15651     | 4.2588 | 0.30910E-01 | 0.95E-09 |
| 39  | 0.15661     | 4.2615 | 0.85567E-01 | 0.23E-08 |
| 40  | 0.15708     | 4.2742 | 0.17692     | 0.35E-08 |
| 41  | 0.15808     | 4.3016 | 0.18180E-02 | 0.26E-09 |
| 42  | 0.15861     | 4.3161 | 0.43908E-04 | 0.10E-09 |
| 43  | 0.15992     | 4.3516 | 0.51079E-03 | 0.10E-09 |
| 44  | 0.16110     | 4.3837 | 0.98189E-01 | 0.37E-09 |
| 45  | 0.16184     | 4.4038 | 0.10620E-01 | 0.52E-08 |
| 46  | 0.16243     | 4.4200 | 0.24966E-01 | 0.41E-08 |
| 47  | 0.16417     | 4.4674 | 0.38689E-02 | 0.50E-06 |
| 48  | 0.16459     | 4.4786 | 0.14993E-01 | 0.99E-06 |
| 49  | 0.16547     | 4.5027 | 0.35406E-02 | 0.30E-06 |
| 50  | 0.16600     | 4.5170 | 0.11283E-02 | 0.29E-06 |

## 5) References:

(1) Eva, version 15.0.0.0; Bruker-AXS, Madison, WI, USA, 2009.
